12. Fiscella K, Roman-Diaz M, Lue BH, Botelho R, Frankel R: "Being a foreigner, I may be punished if I make a small mistake": Assessing transcultural experiences in caring for patients. *Fam Pract* 1997; 14:112-6
13. Epstein RM: Mindful practice. *JAMA* 1999; 282:833-9
14. Levine RB, Kern DE, Wright SM: The impact of prompted narrative writing during internship on reflective practice: A qualitative study. *Adv Health Sci Educ Theory Pract* 2008; 13:723-33
15. Browning DM, Meyer EC, Truog RD, Solomon MZ: Difficult conversations in health care: Cultivating relational learning to address the hidden curriculum. *Acad Med* 2007; 82:905-13
16. Pope C, Ziebland S, Mays N: Qualitative research in health care: Analysing qualitative data. *BMJ* 2000; 320:114-6
17. Strauss AL, Corbin JM: *Basics of Qualitative Research: Grounded Theory Procedures and Techniques*. Newbury Park, California, Sage, 1990
18. Lamiani G, Meyer EC, Rider EA, Browning DM, Vegni E, Mauri E, Moja EA, Truog RD: Assumptions and blind spots in patient-centredness: Action research between American and Italian health care professionals. *Med Educ* 2008; 42:712-20
19. Meyer EC, Ritholz MD, Burns JP, Truog RD: Improving the quality of end-of-life care in the pediatric intensive care unit: Parents' priorities and recommendations. *Pediatrics* 2006; 117:649-57
20. Steinemann S, Furoy D, Yost F, Furumoto N, Lam G, Murayama K: Marriage of professional and technical tasks: A strategy to improve obtaining informed consent. *Am J Surg* 2006; 191:696-700
21. Newman P, Peile E: Valuing learners' experience and supporting further growth: Educational models to help experienced adult learners in medicine. *BMJ* 2002; 325:200-2
22. Stelfox HT, Gandhi TK, Orav EJ, Gustafson ML: The relation of patient satisfaction with complaints against physicians and malpractice lawsuits. *Am J Med* 2005; 118:1126-33
23. Maslach C, Schaufeli WB, Leiter MP: Job burnout. *Annu Rev Psychol* 2001; 52:397-422
24. Leiter MP, Maslach C: Six areas of worklife: A model of the organizational context of burnout. *J Health Hum Serv Adm* 1999; 21:472-89
25. Kopp VJ, Shafer A: Anesthesiologists and perioperative communication. *ANESTHESIOLOGY* 2000; 93:548-55

## ■ ANESTHESIOLOGY REFLECTIONS

### W. T. G. Morton's "Letheon" Advertisement

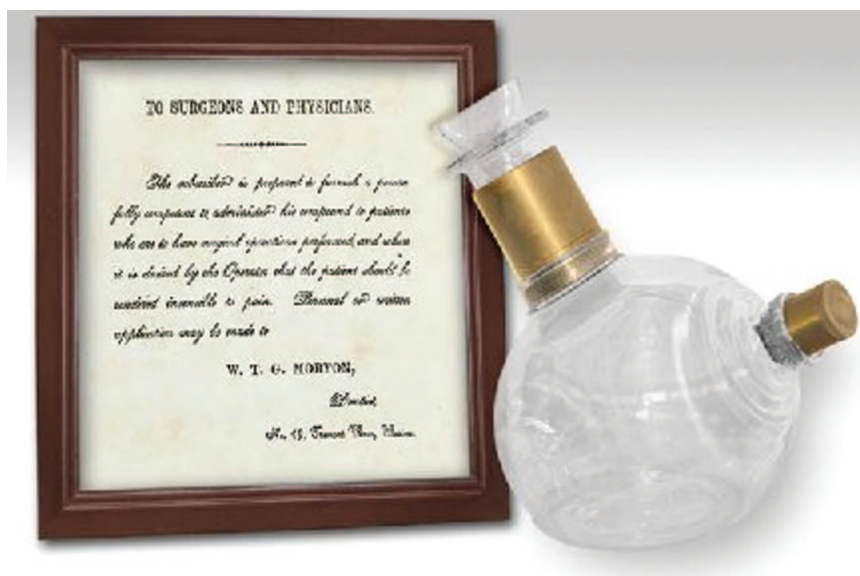

After successfully demonstrating in 1846 the use of diethyl ether for surgical anesthesia, William T. G. Morton (1819–1868) adulterated his anesthetic agent with oil of orange, branded the mixture "Letheon," and dreamed of collecting royalties from future etherizers. In this advertisement, Morton notes that the "subscriber is prepared to furnish a person fully competent to administer his compound to patients who are to have surgical operations performed, and when it is desired by the Operator that the patient should be rendered insensible to pain. Personal or written application may be made to W. T. G. Morton, Dentist . . ." (Copyright © the American Society of Anesthesiologists, Inc. This image appears in the *Anesthesiology Reflections* online collection available at [www.anesthesiology.org](http://www.anesthesiology.org).)

George S. Bause, M.D., M.P.H., Honorary Curator, ASA's Wood Library-Museum of Anesthesiology, Park Ridge, Illinois, and Clinical Associate Professor, Case Western Reserve University, Cleveland, Ohio. [UJYC@aol.com](mailto:UJYC@aol.com).
